# Supplementary material for: Association Between Hospice Enrollment and Total Health Care Costs for Insurers and Families, 2002-2018
Source: PubMed Central journal article supplement (PMC8903119; doi:10.1001/jamahealthforum.2021.5104), 2022-02-11
Supplement: jamahealthforum-e215104-s001.pdf [file jamahealthforum-e215104-s001.pdf]

## Supplemental Online Content

Aldridge MD, Moreno J, McKendrick K, Li L, Brody A, May P. Association between hospice enrollment and total health care costs for insurers and families, 2002-2018. *JAMA Health Forum*. 2022;3(2):e215104. doi:10.1001/jamahealthforum.2021.5104

**eTable 1.** Sample Derivation, Medicare Current Beneficiary Survey, 2002-2018

**eTable 2.** Standardized Differences between the Hospice and No Hospice Groups Before and After Propensity Score Weighting

**eTable 3.** Hospice Use for Sampled Community-Dwelling Medicare Current Beneficiary Survey Participants, 2002-2018

**eTable 4.** Adjusted Healthcare Expenditures at the End of Life for Individuals Enrolled with Hospice and Non-Hospice Controls, 2002-2018, *including those who disenrolled from hospice in the hospice group*

**eTable 5.** Adjusted Healthcare Expenditures at the End of Life for Individuals Enrolled with Hospice and Non-Hospice Controls, 2002-2009 and 2010-2018

This supplemental material has been provided by the authors to give readers additional information about their work.

**eTable 1. Sample Derivation, Medicare Current Beneficiary Survey, 2002-2018**

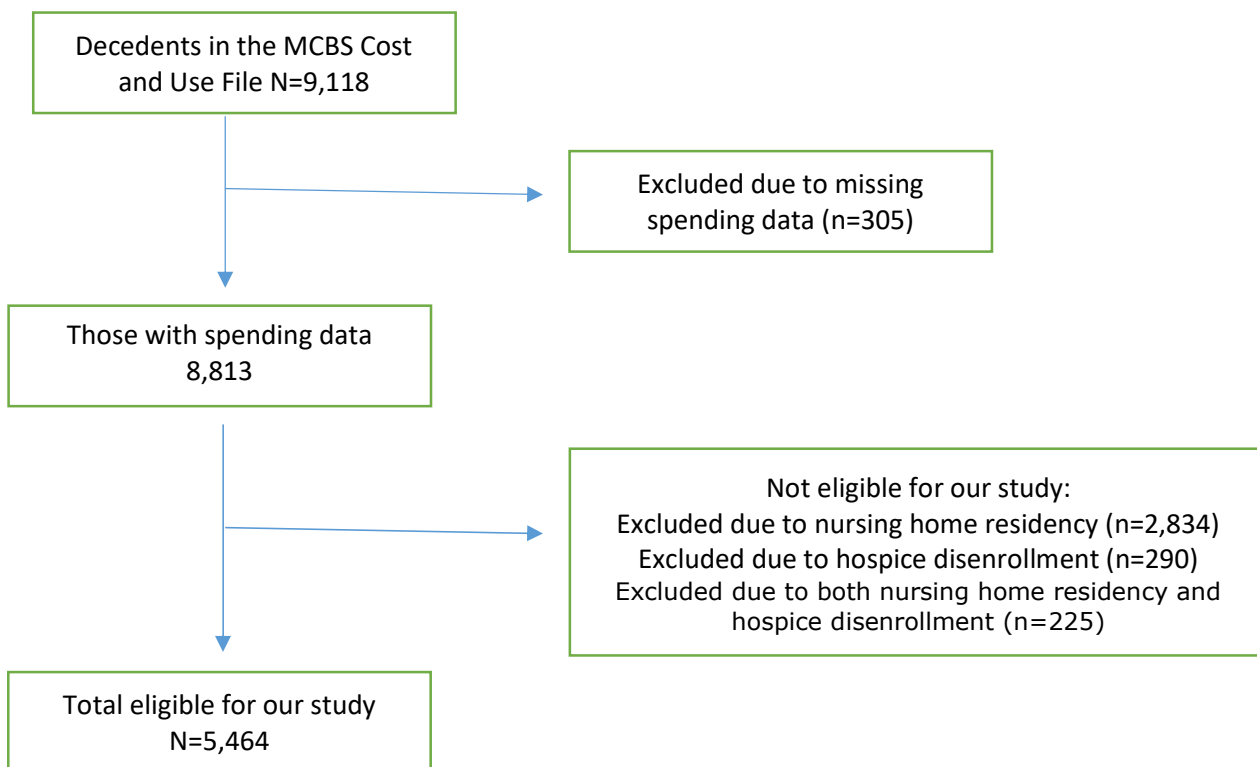

**eTable 2. Standardized Differences between the Hospice and No Hospice Groups Before and After Propensity Score Weighting**

| Group                          | Before Propensity Score Weighting |            |        | After Propensity Score Weighting |            |        |
|--------------------------------|-----------------------------------|------------|--------|----------------------------------|------------|--------|
|                                | Hospice                           | No Hospice | Std    | Hospice                          | No Hospice | Std    |
| Variable                       | Mean                              | Mean       | diff   | Mean                             | Mean       | diff   |
| <b>Last week</b>               |                                   |            |        |                                  |            |        |
| Dementia <sup>P</sup>          | 0.37                              | 0.29       | 0.167  | 0.31                             | 0.31       | -0.009 |
| Region: northeast <sup>P</sup> | 0.13                              | 0.20       | -0.206 | 0.18                             | 0.19       | -0.006 |
| Region: midwest <sup>P</sup>   | 0.26                              | 0.23       | 0.065  | 0.24                             | 0.23       | 0.003  |
| Region: south <sup>P</sup>     | 0.42                              | 0.38       | 0.065  | 0.39                             | 0.39       | 0.000  |
| Region: west <sup>P</sup>      | 0.20                              | 0.18       | 0.042  | 0.19                             | 0.19       | 0.003  |
| Age <sup>P</sup>               | 82.26                             | 78.94      | 0.304  | 79.94                            | 79.61      | 0.030  |
| ADL help 3+ <sup>P</sup>       | 0.62                              | 0.49       | 0.278  | 0.52                             | 0.52       | 0.000  |
| Cancer <sup>P</sup>            | 0.51                              | 0.37       | 0.284  | 0.40                             | 0.40       | 0.004  |
| Female sex                     | 0.49                              | 0.49       | 0.003  | 0.50                             | 0.50       | -0.003 |
| Non-Hispanic white             | 0.81                              | 0.77       | 0.107  | 0.80                             | 0.77       | 0.070  |
| Less than high school          | 0.36                              | 0.39       | -0.068 | 0.37                             | 0.39       | -0.058 |
| Married                        | 0.44                              | 0.41       | 0.058  | 0.44                             | 0.41       | 0.057  |
| Medicaid                       | 0.21                              | 0.27       | -0.145 | 0.24                             | 0.27       | -0.071 |
| Metro                          | 0.78                              | 0.71       | 0.173  | 0.78                             | 0.70       | 0.181  |
| Heart disease                  | 0.43                              | 0.42       | 0.013  | 0.42                             | 0.43       | -0.025 |
| Stroke                         | 0.23                              | 0.23       | -0.014 | 0.22                             | 0.24       | -0.030 |
| Lung disease                   | 0.32                              | 0.31       | 0.011  | 0.31                             | 0.32       | -0.008 |
| Diabetes                       | 0.37                              | 0.35       | 0.051  | 0.37                             | 0.35       | 0.051  |
| <b>Last two weeks</b>          |                                   |            |        |                                  |            |        |
| Dementia <sup>P</sup>          | 0.43                              | 0.29       | 0.290  | 0.31                             | 0.30       | 0.020  |
| Region: northeast <sup>P</sup> | 0.14                              | 0.20       | -0.158 | 0.20                             | 0.20       | -0.005 |
| Region: midwest <sup>P</sup>   | 0.25                              | 0.23       | 0.057  | 0.23                             | 0.23       | 0.007  |
| Region: south <sup>P</sup>     | 0.45                              | 0.38       | 0.140  | 0.39                             | 0.39       | 0.007  |
| Region: west <sup>P</sup>      | 0.15                              | 0.18       | -0.092 | 0.18                             | 0.18       | -0.013 |
| Age <sup>P</sup>               | 83.11                             | 78.94      | 0.382  | 79.47                            | 79.27      | 0.018  |
| ADL help 3+ <sup>P</sup>       | 0.63                              | 0.49       | 0.288  | 0.50                             | 0.50       | 0.003  |
| Cancer <sup>P</sup>            | 0.51                              | 0.37       | 0.281  | 0.38                             | 0.38       | 0.002  |
| Female sex                     | 0.49                              | 0.49       | -0.008 | 0.46                             | 0.50       | -0.071 |
| Non-Hispanic white             | 0.84                              | 0.77       | 0.182  | 0.79                             | 0.77       | 0.045  |
| Less than high school          | 0.40                              | 0.39       | 0.008  | 0.39                             | 0.39       | 0.000  |
| Married                        | 0.41                              | 0.41       | 0.002  | 0.43                             | 0.41       | 0.028  |
| Medicaid                       | 0.15                              | 0.27       | -0.305 | 0.14                             | 0.27       | -0.309 |
| Metro                          | 0.80                              | 0.71       | 0.214  | 0.84                             | 0.71       | 0.305  |
| Heart disease                  | 0.38                              | 0.42       | -0.097 | 0.35                             | 0.43       | -0.161 |
| Stroke                         | 0.25                              | 0.23       | 0.041  | 0.24                             | 0.23       | 0.021  |
| Lung disease                   | 0.31                              | 0.31       | 0.001  | 0.28                             | 0.31       | -0.070 |
| Diabetes                       | 0.33                              | 0.35       | -0.041 | 0.32                             | 0.35       | -0.044 |
| <b>Last month</b>              |                                   |            |        |                                  |            |        |

|                                |       |       |        |       |       |        |
|--------------------------------|-------|-------|--------|-------|-------|--------|
| Dementia <sup>P</sup>          | 0.41  | 0.29  | 0.238  | 0.31  | 0.31  | -0.002 |
| Region: northeast <sup>P</sup> | 0.12  | 0.20  | -0.225 | 0.19  | 0.20  | -0.017 |
| Region: midwest <sup>P</sup>   | 0.23  | 0.23  | -0.009 | 0.23  | 0.23  | 0.009  |
| Region: south <sup>P</sup>     | 0.48  | 0.38  | 0.193  | 0.39  | 0.39  | -0.001 |
| Region: west <sup>P</sup>      | 0.17  | 0.18  | -0.025 | 0.18  | 0.18  | 0.008  |
| Age <sup>P</sup>               | 81.94 | 78.94 | 0.271  | 80.11 | 79.18 | 0.085  |
| ADL help 3+ <sup>P</sup>       | 0.61  | 0.49  | 0.259  | 0.50  | 0.50  | 0.007  |
| Cancer <sup>P</sup>            | 0.52  | 0.37  | 0.298  | 0.38  | 0.38  | -0.015 |
| Female sex                     | 0.50  | 0.49  | 0.018  | 0.50  | 0.49  | 0.002  |
| Non-Hispanic white             | 0.80  | 0.77  | 0.073  | 0.81  | 0.77  | 0.111  |
| Less than high school          | 0.36  | 0.39  | -0.062 | 0.39  | 0.39  | -0.015 |
| Married                        | 0.48  | 0.41  | 0.125  | 0.48  | 0.41  | 0.140  |
| Medicaid                       | 0.19  | 0.27  | -0.193 | 0.22  | 0.27  | -0.130 |
| Metro                          | 0.79  | 0.71  | 0.186  | 0.80  | 0.71  | 0.209  |
| Heart disease                  | 0.39  | 0.42  | -0.077 | 0.38  | 0.43  | -0.100 |
| Stroke                         | 0.23  | 0.23  | -0.004 | 0.21  | 0.23  | -0.062 |
| Lung disease                   | 0.26  | 0.31  | -0.120 | 0.26  | 0.32  | -0.132 |
| Diabetes                       | 0.24  | 0.35  | -0.241 | 0.24  | 0.35  | -0.243 |
| <b>Last three months</b>       |       |       |        |       |       |        |
| Dementia <sup>P</sup>          | 0.42  | 0.29  | 0.267  | 0.31  | 0.31  | -0.003 |
| Region: northeast <sup>P</sup> | 0.14  | 0.20  | -0.175 | 0.20  | 0.20  | 0.015  |
| Region: midwest <sup>P</sup>   | 0.28  | 0.23  | 0.117  | 0.23  | 0.23  | -0.009 |
| Region: south <sup>P</sup>     | 0.41  | 0.38  | 0.053  | 0.40  | 0.39  | 0.020  |
| Region: west <sup>P</sup>      | 0.17  | 0.18  | -0.028 | 0.17  | 0.18  | -0.029 |
| Age <sup>P</sup>               | 82.43 | 78.94 | 0.318  | 80.29 | 79.23 | 0.097  |
| ADL help 3+ <sup>P</sup>       | 0.60  | 0.49  | 0.227  | 0.50  | 0.50  | -0.004 |
| Cancer <sup>P</sup>            | 0.52  | 0.37  | 0.312  | 0.39  | 0.38  | 0.021  |
| Female sex                     | 0.55  | 0.49  | 0.118  | 0.56  | 0.49  | 0.138  |
| Non-Hispanic white             | 0.85  | 0.77  | 0.209  | 0.82  | 0.77  | 0.140  |
| Less than high school          | 0.34  | 0.39  | -0.118 | 0.35  | 0.39  | -0.090 |
| Married                        | 0.44  | 0.41  | 0.055  | 0.42  | 0.41  | 0.023  |
| Medicaid                       | 0.19  | 0.27  | -0.198 | 0.20  | 0.27  | -0.168 |
| Metro                          | 0.78  | 0.71  | 0.178  | 0.80  | 0.71  | 0.218  |
| Heart disease                  | 0.39  | 0.42  | -0.059 | 0.39  | 0.43  | -0.065 |
| Stroke                         | 0.20  | 0.23  | -0.071 | 0.17  | 0.23  | -0.154 |
| Lung disease                   | 0.30  | 0.31  | -0.038 | 0.30  | 0.31  | -0.039 |
| Diabetes                       | 0.25  | 0.35  | -0.207 | 0.23  | 0.35  | -0.247 |
| <b>Last six months</b>         |       |       |        |       |       |        |
| Dementia <sup>P</sup>          | 0.51  | 0.29  | 0.454  | 0.30  | 0.30  | -0.016 |
| Region: northeast <sup>P</sup> | 0.17  | 0.20  | -0.092 | 0.20  | 0.20  | 0.002  |
| Region: midwest <sup>P</sup>   | 0.24  | 0.23  | 0.037  | 0.23  | 0.23  | 0.003  |
| Region: south <sup>P</sup>     | 0.40  | 0.38  | 0.024  | 0.39  | 0.39  | 0.009  |
| Region: west <sup>P</sup>      | 0.19  | 0.18  | 0.021  | 0.18  | 0.18  | -0.017 |
| Age <sup>P</sup>               | 83.75 | 78.94 | 0.447  | 78.56 | 79.23 | -0.062 |
| ADL help 3+ <sup>P</sup>       | 0.71  | 0.49  | 0.466  | 0.50  | 0.50  | -0.010 |

|                                |       |       |        |       |       |        |
|--------------------------------|-------|-------|--------|-------|-------|--------|
| Cancer <sup>P</sup>            | 0.45  | 0.37  | 0.167  | 0.38  | 0.38  | 0.005  |
| Female sex                     | 0.61  | 0.49  | 0.237  | 0.58  | 0.50  | 0.177  |
| Non-Hispanic white             | 0.87  | 0.77  | 0.271  | 0.78  | 0.77  | 0.043  |
| Less than high school          | 0.37  | 0.39  | -0.040 | 0.37  | 0.39  | -0.059 |
| Married                        | 0.44  | 0.41  | 0.058  | 0.49  | 0.41  | 0.161  |
| Medicaid                       | 0.16  | 0.27  | -0.272 | 0.14  | 0.27  | -0.315 |
| Metro                          | 0.77  | 0.71  | 0.145  | 0.77  | 0.71  | 0.139  |
| Heart disease                  | 0.40  | 0.42  | -0.038 | 0.36  | 0.43  | -0.141 |
| Stroke                         | 0.26  | 0.23  | 0.065  | 0.22  | 0.23  | -0.038 |
| Lung disease                   | 0.31  | 0.31  | -0.002 | 0.34  | 0.31  | 0.063  |
| Diabetes                       | 0.29  | 0.35  | -0.122 | 0.30  | 0.35  | -0.108 |
| <b>More than six months</b>    |       |       |        |       |       |        |
| Dementia <sup>P</sup>          | 0.55  | 0.29  | 0.536  | 0.30  | 0.32  | -0.031 |
| Region: northeast <sup>P</sup> | 0.12  | 0.20  | -0.226 | 0.20  | 0.20  | 0.007  |
| Region: midwest <sup>P</sup>   | 0.21  | 0.23  | -0.033 | 0.23  | 0.23  | 0.009  |
| Region: south <sup>P</sup>     | 0.46  | 0.38  | 0.158  | 0.38  | 0.39  | -0.015 |
| Region: west <sup>P</sup>      | 0.20  | 0.18  | 0.048  | 0.18  | 0.18  | 0.002  |
| Age <sup>P</sup>               | 85.65 | 78.94 | 0.654  | 79.60 | 79.39 | 0.020  |
| ADL help 3+ <sup>P</sup>       | 0.72  | 0.49  | 0.501  | 0.51  | 0.51  | 0.013  |
| Cancer <sup>P</sup>            | 0.50  | 0.37  | 0.274  | 0.39  | 0.38  | 0.013  |
| Female sex                     | 0.62  | 0.49  | 0.252  | 0.62  | 0.50  | 0.256  |
| Non-Hispanic white             | 0.85  | 0.77  | 0.201  | 0.82  | 0.77  | 0.145  |
| Less than high school          | 0.45  | 0.39  | 0.113  | 0.50  | 0.39  | 0.206  |
| Married                        | 0.30  | 0.41  | -0.249 | 0.31  | 0.41  | -0.203 |
| Medicaid                       | 0.23  | 0.27  | -0.100 | 0.19  | 0.27  | -0.185 |
| Metro                          | 0.80  | 0.71  | 0.213  | 0.82  | 0.71  | 0.273  |
| Heart disease                  | 0.46  | 0.42  | 0.067  | 0.42  | 0.43  | -0.010 |
| Stroke                         | 0.26  | 0.23  | 0.070  | 0.14  | 0.23  | -0.210 |
| Lung disease                   | 0.28  | 0.31  | -0.070 | 0.27  | 0.31  | -0.097 |
| Diabetes                       | 0.23  | 0.35  | -0.248 | 0.25  | 0.35  | -0.213 |

<sup>P</sup> Variables included in the propensity model.

**eTable 3. Hospice Use for Sampled Community-Dwelling Medicare Current Beneficiary Survey Participants, 2002-2018**

|           | Proportion of Decedents Enrolled with Hospice |
|-----------|-----------------------------------------------|
| 2002-2005 | 28.3%                                         |
| 2006-2009 | 33.3%                                         |
| 2010-2013 | 41.5%                                         |
| 2015-2018 | 46.8%                                         |

*Note: Medicare Current Beneficiary Survey data were not released by Centers for Medicare & Medicaid Services for 2014.*

**eTable 4. Adjusted Healthcare Expenditures at the End of Life for Individuals Enrolled with Hospice and Non-Hospice Controls, 2002-2018, including those who disenrolled from hospice in the hospice group**

|                             | Hospice Group<br>Adjusted Mean \$ | Propensity Score<br>Weighted Controls<br>Adjusted Mean \$ | Difference | P-value |
|-----------------------------|-----------------------------------|-----------------------------------------------------------|------------|---------|
| <b>Total Expenditures</b>   |                                   |                                                           |            |         |
| Last 3 days <sup>a</sup>    | 2,465                             | 5,286                                                     | -2,821     | <.001   |
| Last week <sup>b</sup>      | 2,379                             | 8,911                                                     | -6,533     | <.001   |
| Last 2 weeks <sup>c</sup>   | 4,365                             | 12,879                                                    | -8,514     | <.001   |
| Last month <sup>d</sup>     | 9,626                             | 20,333                                                    | -10,707    | <.001   |
| Last 3 months <sup>e</sup>  | 22,549                            | 31,886                                                    | -9,337     | <.001   |
| Last 6 months <sup>f</sup>  | 44,431                            | 43,461                                                    | 970        | .82     |
| <b>Family Out of Pocket</b> |                                   |                                                           |            |         |
| Last 3 days <sup>a</sup>    | 66                                | 139                                                       | -73        | <.001   |
| Last week <sup>b</sup>      | 54                                | 260                                                       | -206       | <.001   |
| Last 2 weeks <sup>c</sup>   | 141                               | 425                                                       | -284       | <.001   |
| Last month <sup>d</sup>     | 258                               | 910                                                       | -652       | <.001   |
| Last 3 months <sup>e</sup>  | 2,119                             | 1,773                                                     | 346        | .53     |
| Last 6 months <sup>f</sup>  | 4,068                             | 2,974                                                     | 1,094      | .26     |
| <b>Medicare</b>             |                                   |                                                           |            |         |
| Last 3 days <sup>a</sup>    | 2,119                             | 4388                                                      | -2,269     | <.001   |
| Last week <sup>b</sup>      | 2,286                             | 7,341                                                     | -5,055     | <.001   |
| Last 2 weeks <sup>c</sup>   | 4,094                             | 10,589                                                    | -6,495     | <.001   |
| Last month <sup>d</sup>     | 8,805                             | 16,589                                                    | -7,784     | <.001   |
| Last 3 months <sup>e</sup>  | 19,070                            | 25,294                                                    | -6,224     | <.001   |
| Last 6 months <sup>f</sup>  | 36,086                            | 33,157                                                    | 2,929      | .39     |
| <b>Private Insurance</b>    |                                   |                                                           |            |         |
| Last 3 days <sup>a</sup>    | 88                                | 207                                                       | -119       | <.001   |
| Last week <sup>b</sup>      | 5                                 | 355                                                       | -350       | <.001   |
| Last 2 weeks <sup>c</sup>   | 15                                | 551                                                       | -536       | <.001   |
| Last month <sup>d</sup>     | 80                                | 919                                                       | -839       | <.001   |
| Last 3 months <sup>e</sup>  | 236                               | 1,495                                                     | -1,259     | <.001   |
| Last 6 months <sup>f</sup>  | 629                               | 2,336                                                     | -1,707     | <.001   |
| <b>All Other Payers</b>     |                                   |                                                           |            |         |
| Last 3 days <sup>a</sup>    | 228                               | 569                                                       | -340       | <.001   |
| Last week <sup>b</sup>      | 89                                | 982                                                       | -894       | <.001   |
| Last 2 weeks <sup>c</sup>   | 77                                | 1,418                                                     | -1,341     | <.001   |
| Last month <sup>d</sup>     | 277                               | 2,150                                                     | -1,873     | <.001   |
| Last 3 months <sup>e</sup>  | 775                               | 3,589                                                     | -2,814     | <.001   |
| Last 6 months <sup>f</sup>  | 1,889                             | 5,594                                                     | -3,705     | <.001   |

**Notes:**

*Variables included in the covariate balancing propensity score: age, dementia, cancer, help w 3+ ADLs, region; Variables included in the GLM model: age, sex, race/ethnicity, education, marital status, survey year, Medicaid status, census region, census metropolitan area, serious*

*illness (dementia, heart disease, stroke, lung disease, cancer, and diabetes), and if the respondent needed help with 3 or more ADLs.*

*Sample sizes vary due to hospice enrollment period: <sup>a</sup> hospice enrollment in the last week of life and comparison group (N=3,803); <sup>b</sup> hospice enrollment 8-14 days before death and comparison group (N=3,258); <sup>c</sup> hospice enrollment 15-28 days before death and comparison group (N=3,240); <sup>d</sup> hospice enrollment 29-91 days before death and comparison group (N=3,230); <sup>e</sup> hospice enrollment 92-182 days before death and comparison group (N=2,865); <sup>f</sup> hospice enrollment >182 days before death and comparison group (N=2,666).*

*All Other Payers includes Medicare Advantage, Medicaid, private HMOs, Veteran's Administration, and other.*



**eTable 5. Adjusted Healthcare Expenditures at the End of Life for Individuals Enrolled with Hospice and Non-Hospice Controls, 2002-2009 and 2010-2018**

|                             | 2002-2009                      |                                                     |            |    | 2010-2018                      |                                                     |            |    |
|-----------------------------|--------------------------------|-----------------------------------------------------|------------|----|--------------------------------|-----------------------------------------------------|------------|----|
|                             | Hospice Group Adjusted Mean \$ | Propensity Score Weighted Controls Adjusted Mean \$ | Difference |    | Hospice Group Adjusted Mean \$ | Propensity Score Weighted Controls Adjusted Mean \$ | Difference |    |
| <b>Total</b>                |                                |                                                     |            |    |                                |                                                     |            |    |
| Last 3 days <sup>a</sup>    | 2,466                          | 5,270                                               | -2,804     | ** | 2,507                          | 5,307                                               | -2,799     | ** |
| Last week <sup>b</sup>      | 1,830                          | 8,983                                               | -7,153     | ** | 2,397                          | 8,788                                               | -6,391     | ** |
| Last 2 weeks <sup>c</sup>   | 3,770                          | 13,339                                              | -9,569     | ** | 4,439                          | 12,166                                              | -7,727     | ** |
| Last month <sup>d</sup>     | 8,602                          | 21,151                                              | -12,549    | ** | 8,559                          | 18,995                                              | -10,436    | ** |
| Last 3 months <sup>e</sup>  | 19,551                         | 32,056                                              | -12,505    | ** | 21,908                         | 31,452                                              | -9,543     | ** |
| Last 6 months <sup>f</sup>  | 39,368                         | 43,084                                              | -3,717     |    | 56,437                         | 43,832                                              | 12,605     |    |
| <b>Family Out of Pocket</b> |                                |                                                     |            |    |                                |                                                     |            |    |
| Last 3 days <sup>a</sup>    | 79                             | 138                                                 | -59        | *  | 53                             | 144                                                 | -92        | ** |
| Last week <sup>b</sup>      | 57                             | 269                                                 | -212       | ** | 35                             | 253                                                 | -218       | ** |
| Last 2 weeks <sup>c</sup>   | 182                            | 444                                                 | -262       | *  | 116                            | 410                                                 | -295       | ** |
| Last month <sup>d</sup>     | 244                            | 936                                                 | -692       | ** | 215                            | 917                                                 | -702       | ** |
| Last 3 months <sup>e</sup>  | 949                            | 1,840                                               | -891       | *  | 3,039                          | 1,697                                               | 1,342      |    |
| Last 6 months <sup>f</sup>  | 1,673                          | 3,074                                               | -1,401     | *  | 7,727                          | 2,936                                               | 4,791      |    |
| <b>Medicare</b>             |                                |                                                     |            |    |                                |                                                     |            |    |
| Last 3 days <sup>a</sup>    | 2,112                          | 4,379                                               | -2,267     | ** | 2,190                          | 4,404                                               | -2,214     | ** |
| Last week <sup>b</sup>      | 1,722                          | 7,420                                               | -5,697     | ** | 2,440                          | 7,221                                               | -4,782     | ** |
| Last 2 weeks <sup>c</sup>   | 3,488                          | 11,004                                              | -7,516     | ** | 4,411                          | 9,953                                               | -5,542     | ** |
| Last month <sup>d</sup>     | 8,080                          | 17,287                                              | -9,207     | ** | 7,880                          | 15,438                                              | -7,558     | ** |
| Last 3 months <sup>e</sup>  | 17,239                         | 25,534                                              | -8,295     | ** | 17,535                         | 24,919                                              | -7,384     | ** |
| Last 6 months <sup>f</sup>  | 35,486                         | 32,736                                              | 2,749      |    | 42,747                         | 33,666                                              | 9,081      |    |
| <b>Private</b>              |                                |                                                     |            |    |                                |                                                     |            |    |
| Last 3 days <sup>a</sup>    | 101                            | 195                                                 | -94        | *  | 77                             | 291                                                 | -214       | ** |
| Last week <sup>b</sup>      | 1                              | 385                                                 | -383       | ** | 4                              | 417                                                 | -413       | ** |
| Last 2 weeks <sup>c</sup>   | 23                             | 573                                                 | -550       | ** | 3                              | 885                                                 | -882       | ** |
| Last month <sup>d</sup>     | 36                             | 1,066                                               | -1,029     | ** | 77                             | 978                                                 | -901       | ** |
| Last 3 months <sup>e</sup>  | 85                             | 1,782                                               | -1,697     | ** | 207                            | 1,587                                               | -1,380     | ** |
| Last 6 months <sup>f</sup>  | 158                            | 2,711                                               | -2,554     | ** | 49                             | 2,033                                               | -1,984     | ** |
| <b>All Other Payers</b>     |                                |                                                     |            |    |                                |                                                     |            |    |
| Last 3 days <sup>a</sup>    | 185                            | 583                                                 | -398       | ** | 243                            | 582                                                 | -339       | *  |
| Last week <sup>b</sup>      | 51                             | 991                                                 | -940       | ** | 90                             | 1,033                                               | -943       | ** |
| Last 2 weeks <sup>c</sup>   | 24                             | 1,346                                               | -1,322     | ** | 110                            | 1,438                                               | -1,328     | ** |
| Last month <sup>d</sup>     | 104                            | 2,017                                               | -1,913     | ** | 252                            | 2,382                                               | -2,130     | ** |
| Last 3 months <sup>e</sup>  | 552                            | 3,204                                               | -2,652     | ** | 435                            | 3,989                                               | -3,554     | ** |
| Last 6 months <sup>f</sup>  | 1,291                          | 5,040                                               | -3,749     | ** | 1,057                          | 5,873                                               | -4,816     | ** |

**Notes:**

*Variables included in the covariate balancing propensity score: age, dementia, cancer, help w 3+ ADLs, region; Variables included in the GLM model: age, sex, race/ethnicity, education, marital status, survey year, Medicaid status, census region, census metropolitan area, serious illness (dementia, heart disease, stroke, lung disease, cancer, and diabetes), and if the respondent needed help with 3 or more ADLs.*

*2002-2009: Sample sizes vary due to hospice enrollment period: <sup>a</sup> hospice enrollment in the last week of life and comparison group (N=2,422); <sup>b</sup> hospice enrollment 8-14 days before death and comparison group (N=2,140); <sup>c</sup> hospice enrollment 15-28 days before death and comparison group (N=2,139); <sup>d</sup> hospice enrollment 29-91 days before death and comparison group (N=2,120); <sup>e</sup> hospice enrollment 92-182 days before death and comparison group (N=1,885); <sup>f</sup> hospice enrollment >182 days before death and comparison group (N=1,710).*

*2010-2018: Sample sizes vary due to hospice enrollment period: <sup>a</sup> hospice enrollment in the last week of life and comparison group (N=1,359); <sup>b</sup> hospice enrollment 8-14 days before death and comparison group (N=1,102); <sup>c</sup> hospice enrollment 15-28 days before death and comparison group (N=1,084); <sup>d</sup> hospice enrollment 29-91 days before death and comparison group (N=1,082); <sup>e</sup> hospice enrollment 92-182 days before death and comparison group (N=947); <sup>f</sup> hospice enrollment >182 days before death and comparison group (N=841).*

*All Other Payers includes Medicare Advantage, Medicaid, private HMOs, Veteran's Administration, and other.*

*\* p<0.05 \*\* p<0.001*
